# Supplementary material for: Characterizing variants of unknown significance in rhodopsin: a functional genomics approach
Source: bioRxiv or medRxiv preprint supplement (doi:10.1101/512897), 2019-01-10
Supplement: Supplementary file [file media-3.pdf]

### Supplemental Figure 3

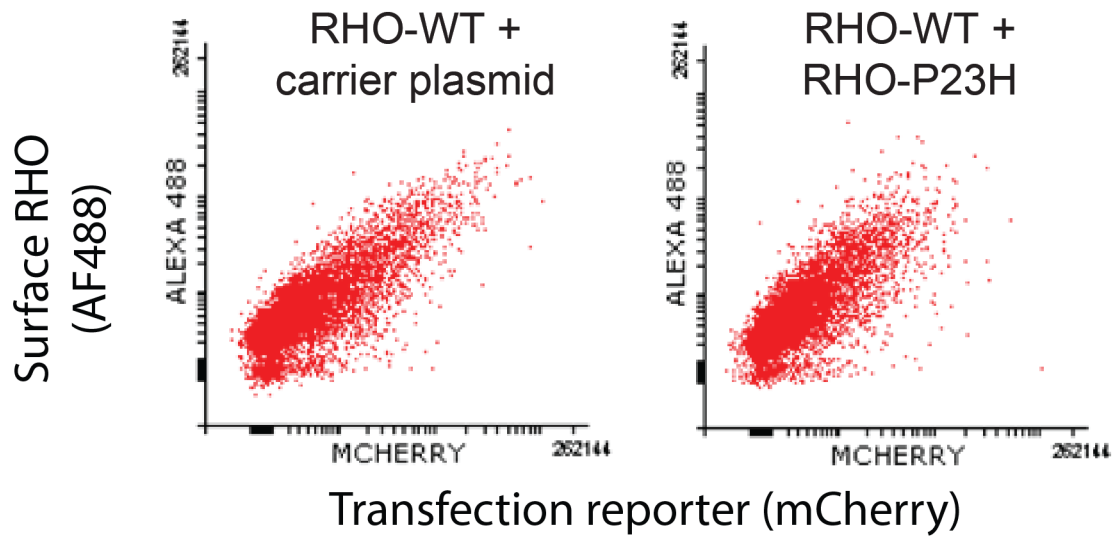

Dominant negative effect not observed. Compared to expression of wildtype RHO alone (left), co-expression of the known dominant mutant RHO-P23H (right) does not prevent wildtype RHO from reaching the cell surface. X-axis: mCherry transfection control. Y-axis: anti-rhodopsin/AF-488.
